# Supplementary material for: Seasonal Differences in Determinants of Time Location Patterns in an Urban Population: A Large Population-Based Study in Korea
Source: PubMed Central journal article supplement (PMC5551110; doi:10.3390/ijerph14070672), 2017-06-22
Supplement: ijerph-14-00672-s001.pdf [file ijerph-14-00672-s001.pdf]

S1. The factors that influence the time spent at other 3 locations in Seoul.

|                              | others' home                                |        | walk                                        |        | other transportation                        |        |
|------------------------------|---------------------------------------------|--------|---------------------------------------------|--------|---------------------------------------------|--------|
|                              | Adj. R <sup>2</sup> = 0.014 P<0.001<br>b±SE | P      | Adj. R <sup>2</sup> = 0.045 P<0.001<br>b±SE | P      | Adj. R <sup>2</sup> = 0.018 P<0.001<br>b±SE | P      |
| <b>Intercept</b>             | -29.6±5.3                                   | <0.001 | 46.1±3.6                                    | <0.001 | 13.2±2.0                                    | <0.001 |
| <b>Working</b>               |                                             |        |                                             |        |                                             |        |
| 1 : Yes                      | 7.2±2.0                                     | <0.001 |                                             |        |                                             |        |
| 2: No                        |                                             |        |                                             |        |                                             |        |
| <b>Age</b>                   | 0.2±0.1                                     | <0.001 | -0.2±0.0                                    | <0.001 | -0.1±0.0                                    | <0.001 |
| <b>Gender</b>                |                                             |        |                                             |        |                                             |        |
| 1: Male                      | 9.2±2.0                                     | <0.001 | 4.9±1.2                                     | <0.001 | -5.8±0.9                                    | <0.001 |
| 2: Female                    |                                             |        |                                             |        |                                             |        |
| <b>Monthly income</b>        |                                             |        | -0.7±0.2                                    | <0.001 |                                             |        |
| <b>Spouse</b>                |                                             |        |                                             |        |                                             |        |
| 1: Yes                       |                                             |        |                                             |        |                                             |        |
| 2: No                        |                                             |        |                                             |        |                                             |        |
| <b>Health condition</b>      |                                             |        |                                             |        |                                             |        |
| 1 : Healthy                  |                                             |        | -2.8±0.7                                    | <0.001 |                                             |        |
| 2 : Poor                     |                                             |        |                                             |        |                                             |        |
| <b>Education</b>             |                                             |        |                                             |        |                                             |        |
| 1 : Higher than high school  |                                             |        | 6.7±1.4                                     | <0.001 | 5.1±1.1                                     | <0.001 |
| 2 : Lower than middle school |                                             |        |                                             |        |                                             |        |
| <b>Seasons</b>               |                                             |        |                                             |        |                                             |        |
| 5: Summer                    | 2.7±1.4                                     | 0.049  | -4.2±0.7                                    | <0.001 |                                             |        |
| 6: Fall                      |                                             |        |                                             |        |                                             |        |
| 7 : Winter                   |                                             |        |                                             |        |                                             |        |

S2. The factors that influence the time spent at other 3 locations in Busan.

|                              | others' home                                |        | walk                                        |        | other transportation                        |        |
|------------------------------|---------------------------------------------|--------|---------------------------------------------|--------|---------------------------------------------|--------|
|                              | Adj. R <sup>2</sup> = 0.014 P<0.001<br>b±SE | P      | Adj. R <sup>2</sup> = 0.046 P<0.001<br>b±SE | P      | Adj. R <sup>2</sup> = 0.036 P<0.001<br>b±SE | P      |
| <b>Intercept</b>             | -20.8±4.4                                   | <0.001 | 34.7±4.7                                    | <0.001 | 67.3±10.4                                   | <0.001 |
| <b>Working</b>               |                                             |        |                                             |        |                                             |        |
| 1 : Yes                      |                                             |        |                                             |        | -4.4±1.3                                    | <0.001 |
| 2: No                        |                                             |        |                                             |        |                                             |        |
| <b>Age</b>                   |                                             |        | -0.2±1.0                                    | <0.001 | -0.2±0.0                                    | <0.001 |
| <b>Gender</b>                |                                             |        |                                             |        |                                             |        |
| 1: Male                      | 4.9±1.8                                     | 0.007  |                                             |        | -5.4±1.2                                    | <0.001 |
| 2: Female                    |                                             |        |                                             |        |                                             |        |
| <b>Monthly income</b>        |                                             |        | -1.0±0.3                                    | <0.001 |                                             |        |
| <b>Spouse</b>                |                                             |        |                                             |        |                                             |        |
| 1: Yes                       |                                             |        | 4.8±1.7                                     | 0.005  |                                             |        |
| 2: No                        |                                             |        |                                             |        |                                             |        |
| <b>Health condition</b>      |                                             |        |                                             |        |                                             |        |
| 1 : Healthy                  |                                             |        | -2.5±1.9                                    | 0.005  |                                             |        |
| 2 : Poor                     |                                             |        |                                             |        |                                             |        |
| <b>Education</b>             |                                             |        |                                             |        |                                             |        |
| 1 : Higher than high school  | 9.0±2.0                                     | <0.001 | 8.0±1.9                                     | <0.001 | 6.5±1.4                                     | <0.001 |
| 2 : Lower than middle school |                                             |        |                                             |        |                                             |        |
| <b>Seasons</b>               |                                             |        |                                             |        |                                             |        |
| 5: Summer                    | 4.6±1.2                                     | <0.001 |                                             |        |                                             |        |
| 6: Fall                      |                                             |        |                                             |        |                                             |        |
| 7 : Winter                   |                                             |        |                                             |        |                                             |        |

**Agricultural**

1: Yes

-23.2±5.0

<0.001

2: No

---
